# Supplementary material for: Quantifying chromosomal instability from intratumoral karyotype diversity using agent-based modeling and Bayesian inference
Source: eLife journal article supplement (doi:10.7554/elife.69799), 2022-04-05

Figure 2 — figure supplement 2: Fitness of diploid and tetraploid CIN+ populations

Diploid Founders

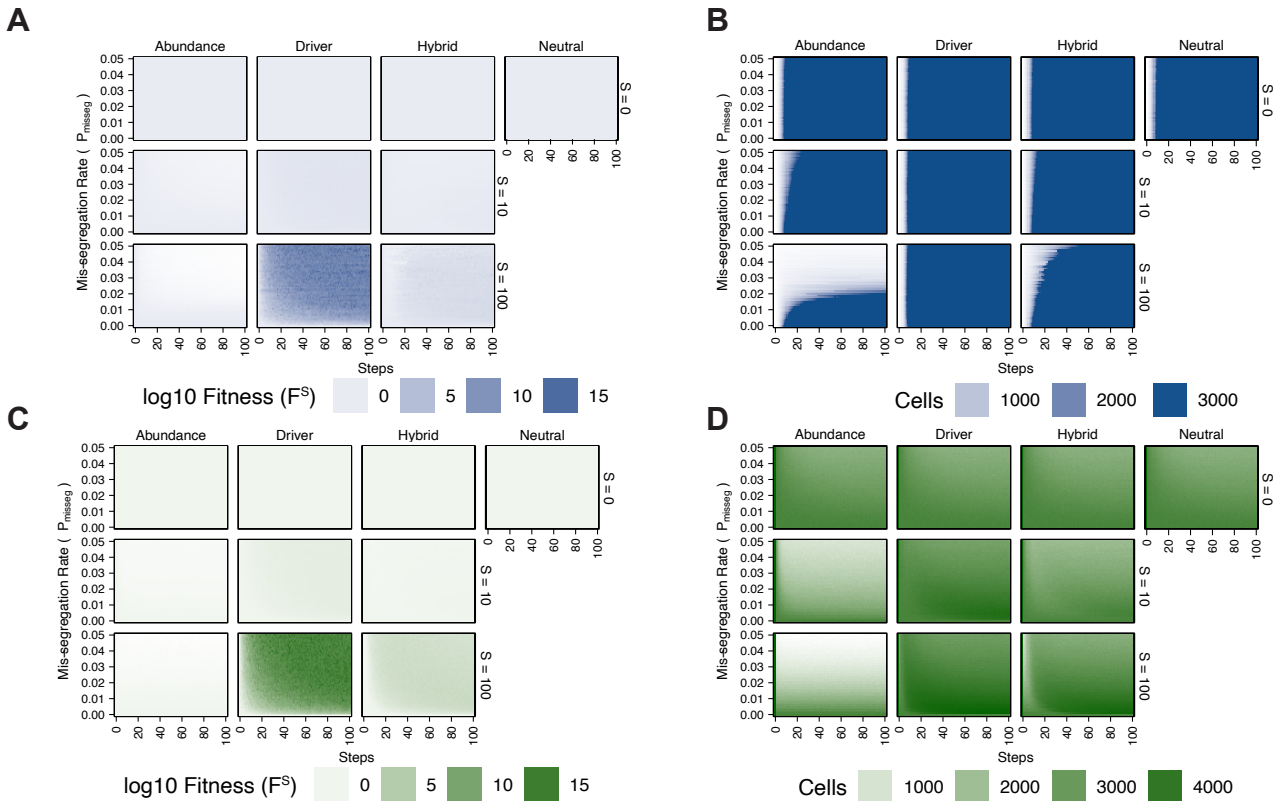

Tetraploid Founders

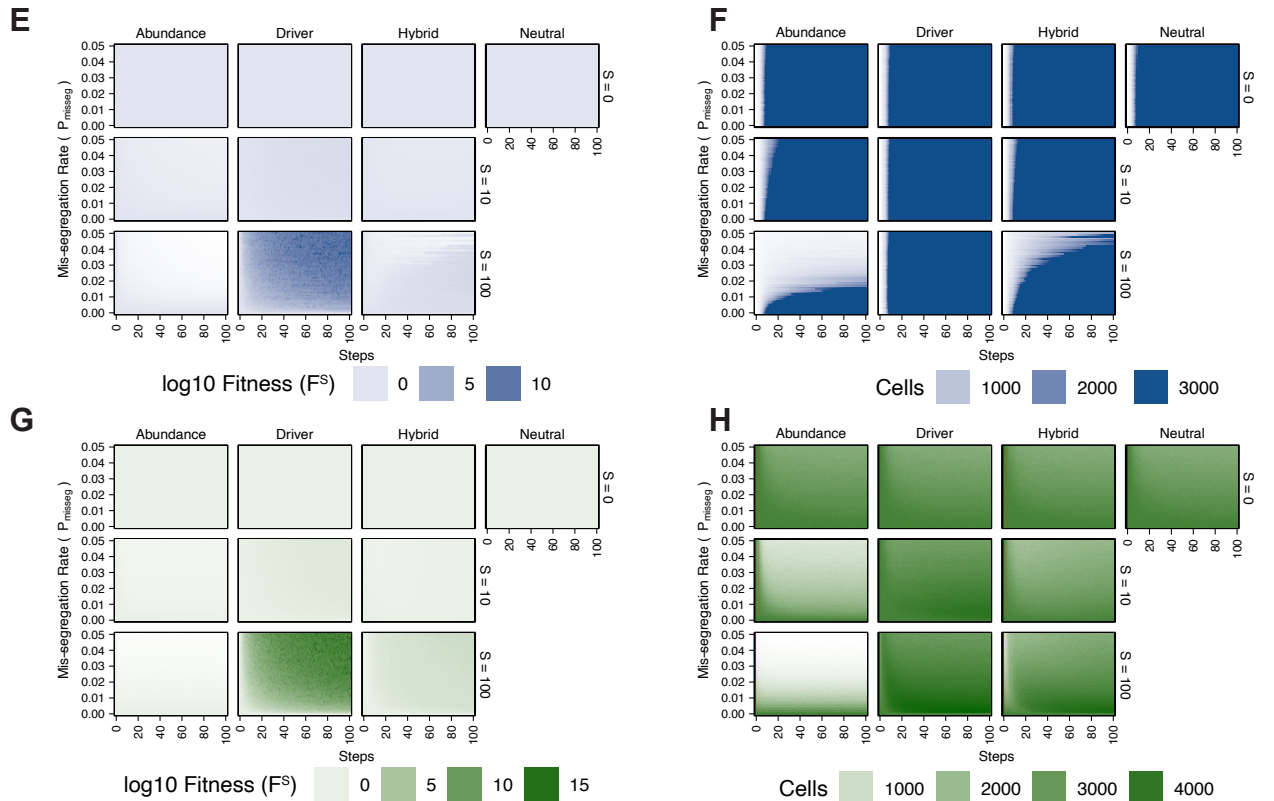

Supplement: supp [file elife-69799-supp-v1.zip]
