# Supplementary material for: Quantifying chromosomal instability from intratumoral karyotype diversity using agent-based modeling and Bayesian inference
Source: eLife journal article supplement (doi:10.7554/elife.69799), 2022-04-05

Figure 6 — figure supplement 4: Validation of selection in longitudinally sequenced CRC organoids

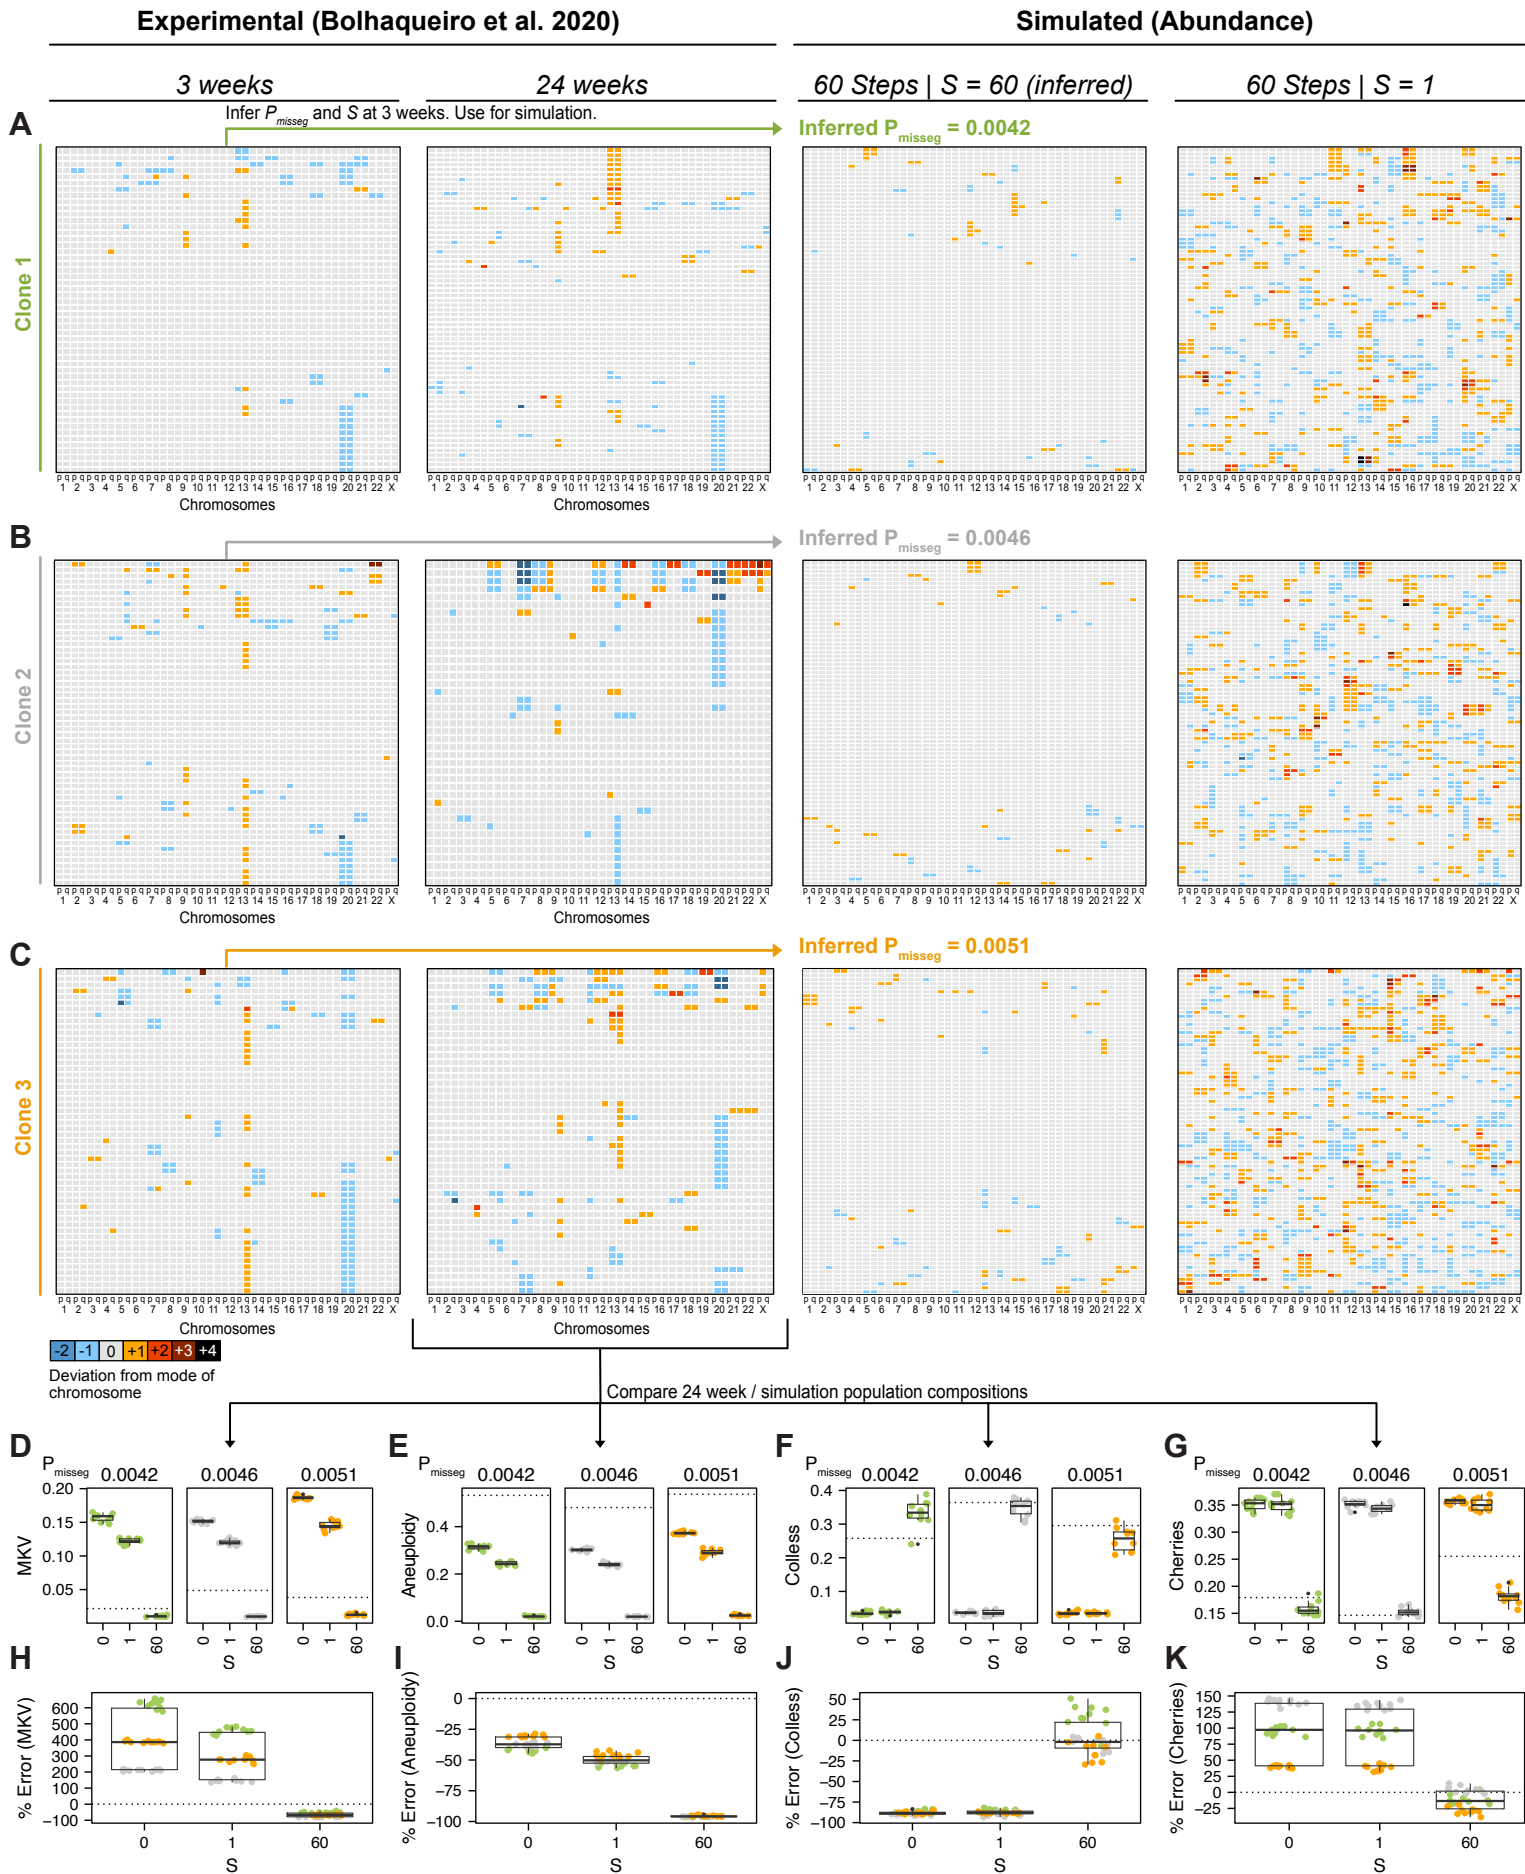

Supplement: supp [file elife-69799-supp-v1.zip]
