# Supplementary material for: Quantifying chromosomal instability from intratumoral karyotype diversity using agent-based modeling and Bayesian inference
Source: eLife journal article supplement (doi:10.7554/elife.69799), 2022-04-05

Figure 5 — figure supplement 4: Nullisomy and posterior predictive checks of summary statistics from paclitaxel-treated Cal51 cells

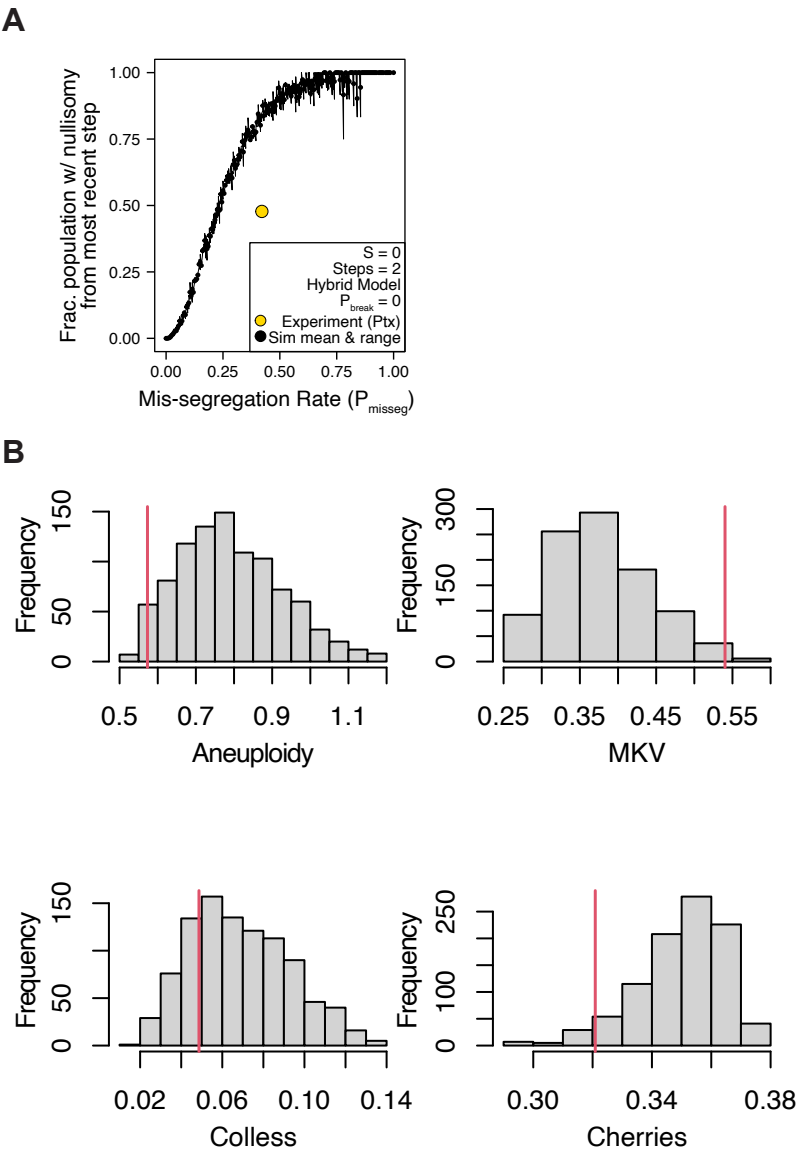

Supplement: supp [file elife-69799-supp-v1.zip]
