# Supplementary material for: Quantifying chromosomal instability from intratumoral karyotype diversity using agent-based modeling and Bayesian inference
Source: eLife journal article supplement (doi:10.7554/elife.69799), 2022-04-05
Supplement: supp [file elife-69799-supp-v1.zip]

Archive with 16 entries (16 files):
- elife_poa_e69799_Figure_1_figure_supplement_1.pdf
- elife_poa_e69799_Figure_1_figure_supplement_2.pdf
- elife_poa_e69799_Figure_2_figure_supplement_1.pdf
- elife_poa_e69799_Figure_2_figure_supplement_2.pdf
- elife_poa_e69799_Figure_3_figure_supplement_1.pdf
- elife_poa_e69799_Figure_5_figure_supplement_1.pdf
- elife_poa_e69799_Figure_5_figure_supplement_2.pdf
- elife_poa_e69799_Figure_5_figure_supplement_3.pdf
- elife_poa_e69799_Figure_5_figure_supplement_4.pdf
- elife_poa_e69799_Figure_5_figure_supplement_5.pdf
- elife_poa_e69799_Figure_6_figure_supplement_1.pdf
- elife_poa_e69799_Figure_6_figure_supplement_2.pdf
- elife_poa_e69799_Figure_6_figure_supplement_3.pdf
- elife_poa_e69799_Figure_6_figure_supplement_4.pdf
- elife_poa_e69799_Figure_6_figure_supplement_5.pdf
- elife_poa_e69799_Transparent_Reporting_File.docx
