# Supplementary material for: Quantifying chromosomal instability from intratumoral karyotype diversity using agent-based modeling and Bayesian inference
Source: eLife journal article supplement (doi:10.7554/elife.69799), 2022-04-05

Figure 2 — figure supplement 1: Chromosomal instability and karyotype selection in constant-size populations approximating Wright-Fisher dynamics

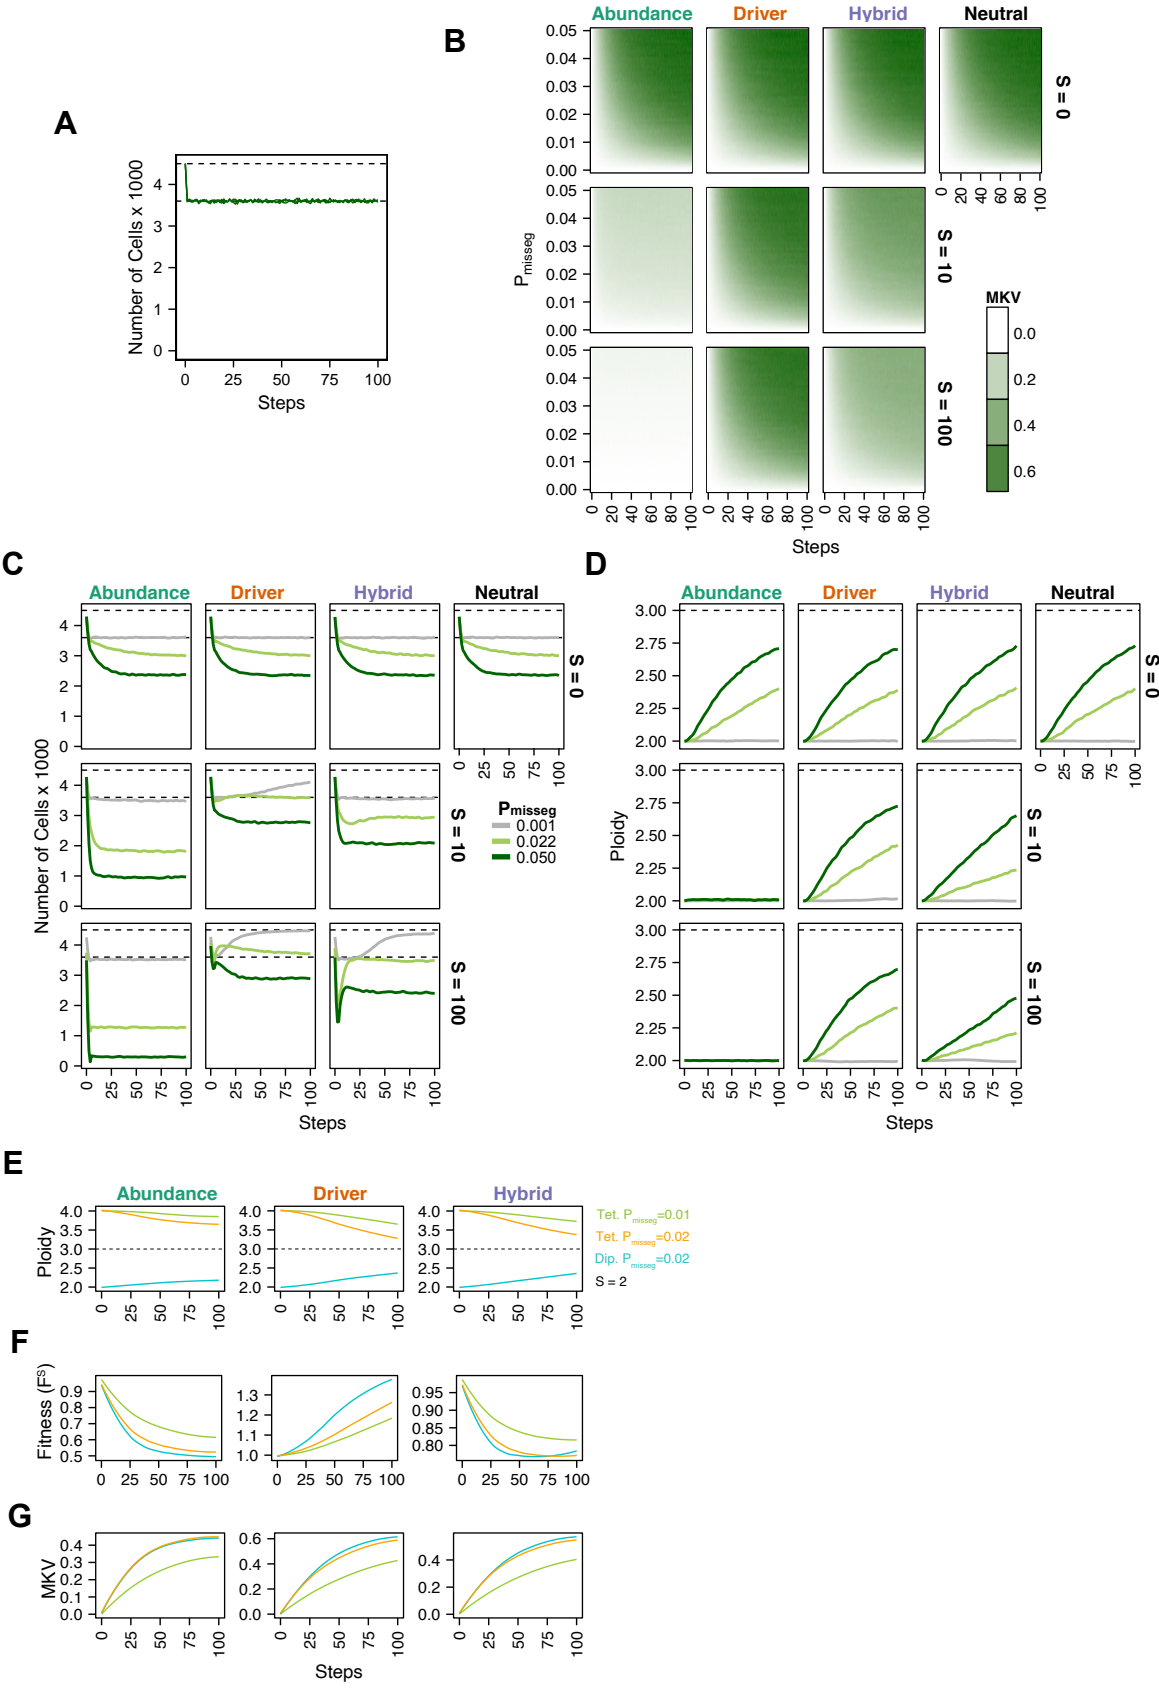

Supplement: supp [file elife-69799-supp-v1.zip › elife_poa_e69799_Figure_2_figure_supplement_1.pdf]
