# Supplementary material for: Quantifying chromosomal instability from intratumoral karyotype diversity using agent-based modeling and Bayesian inference
Source: eLife journal article supplement (doi:10.7554/elife.69799), 2022-04-05

**Figure 6 — figure supplement 3: ABC-inferred mis-segregation rates and selective pressures in patient-derived samples**

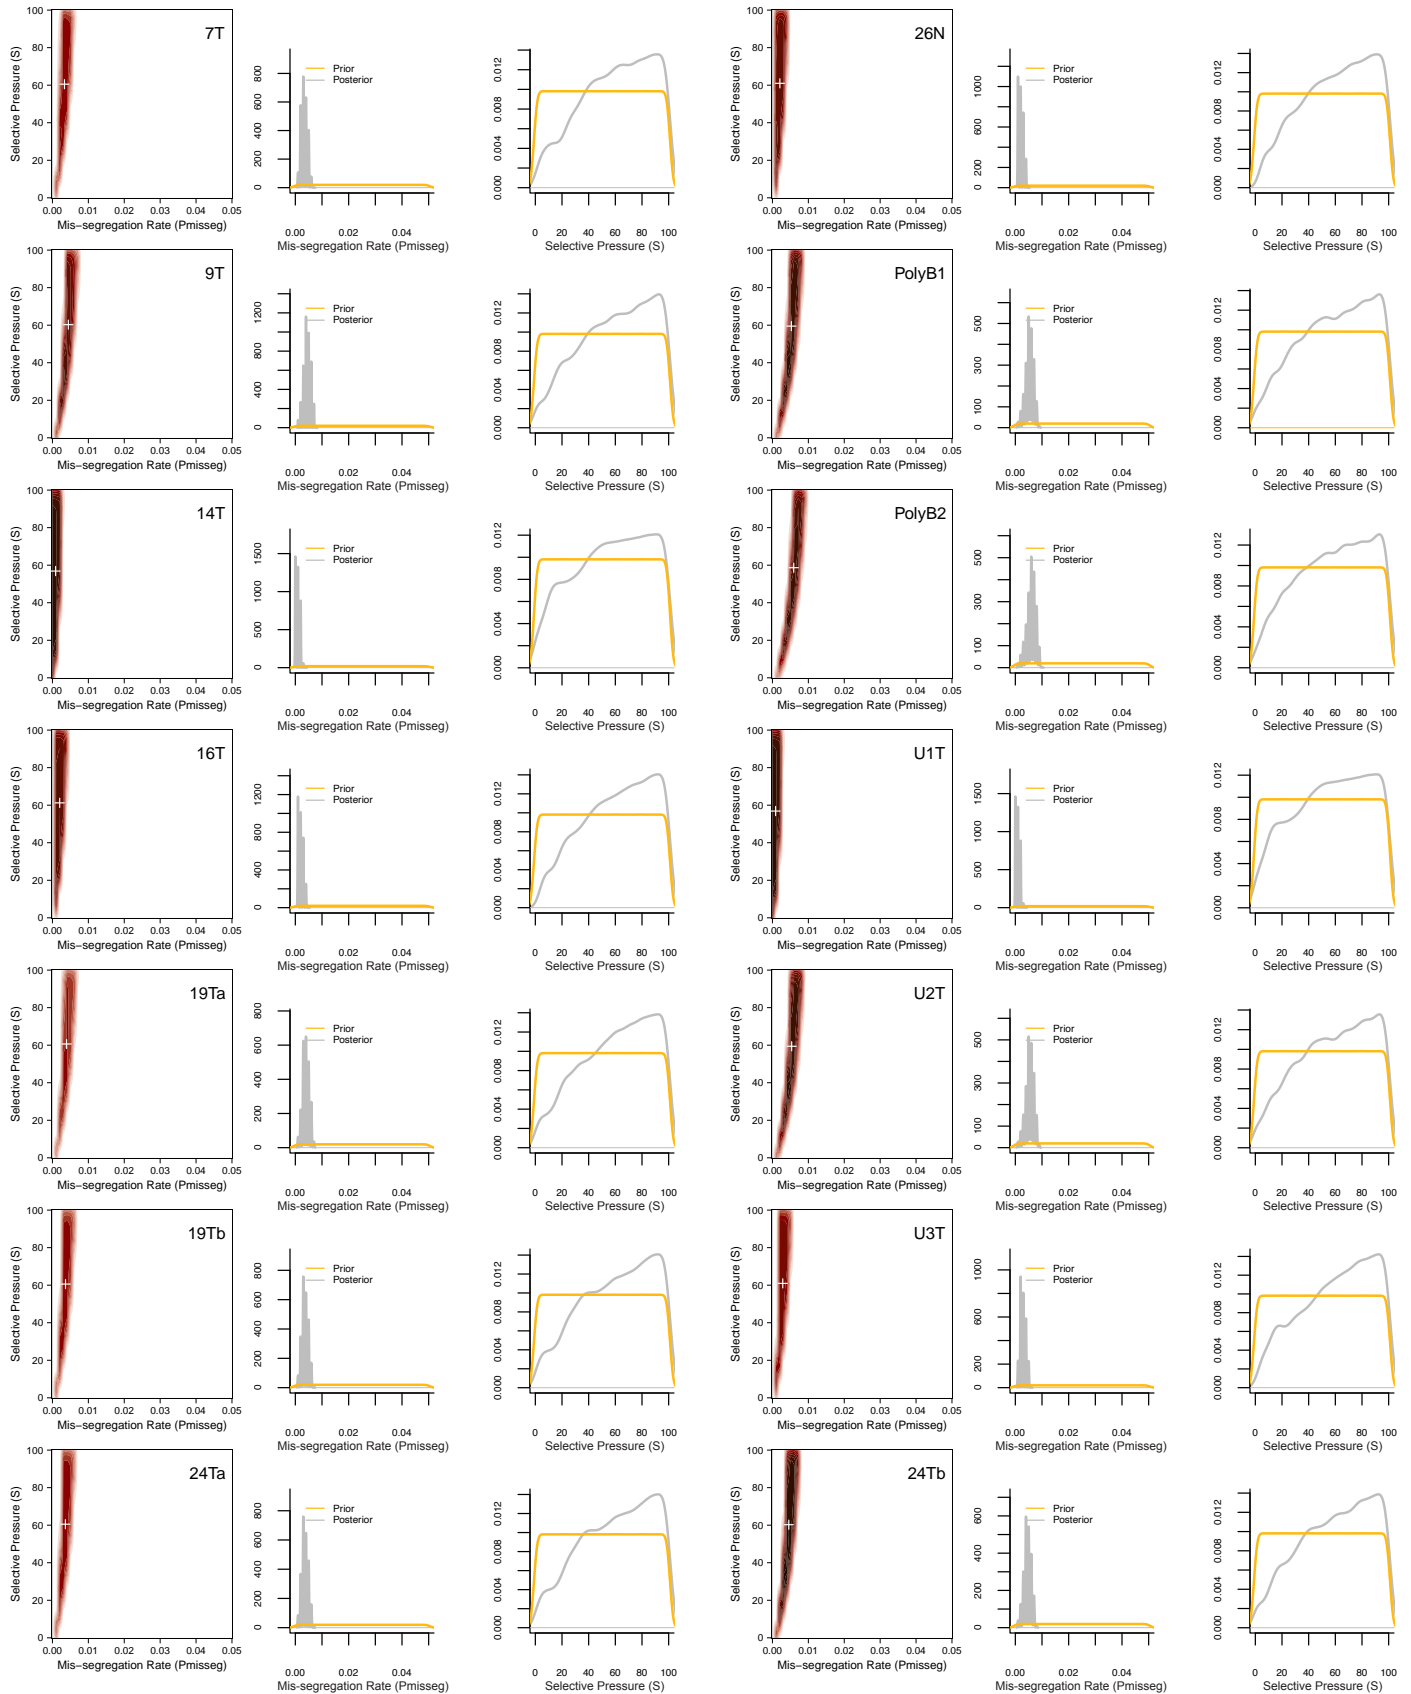

Supplement: supp [file elife-69799-supp-v1.zip › elife_poa_e69799_Figure_6_figure_supplement_3.pdf]
