# Supplementary figures and images for: Quantifying chromosomal instability from intratumoral karyotype diversity using agent-based modeling and Bayesian inference
Source: eLife journal article supplement (doi:10.7554/elife.69799), 2022-04-05

Figure 5 — figure supplement 5: Minimum sampling of karyotype heterogeneity

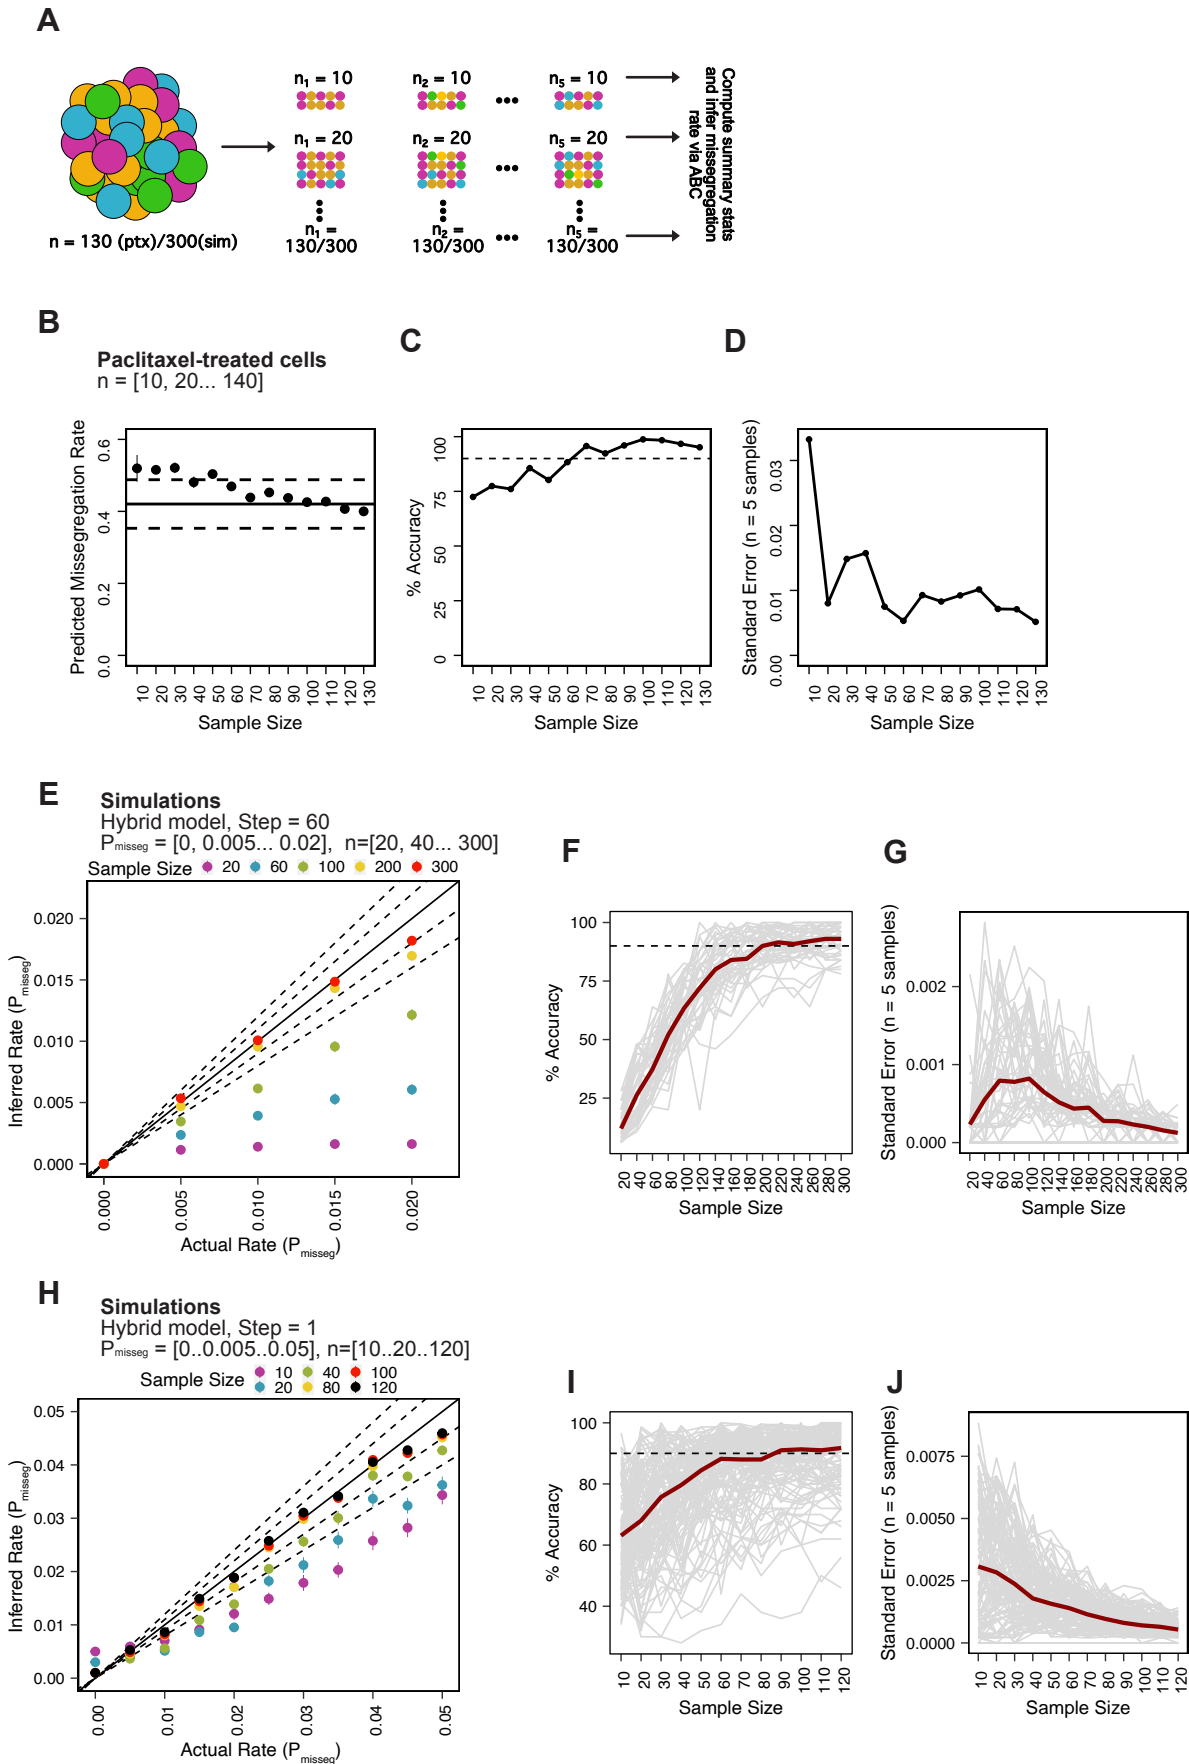

Supplement: supp [file elife-69799-supp-v1.zip]

Figure 1 — figure supplement 2: Population growth limits do not bias population measures

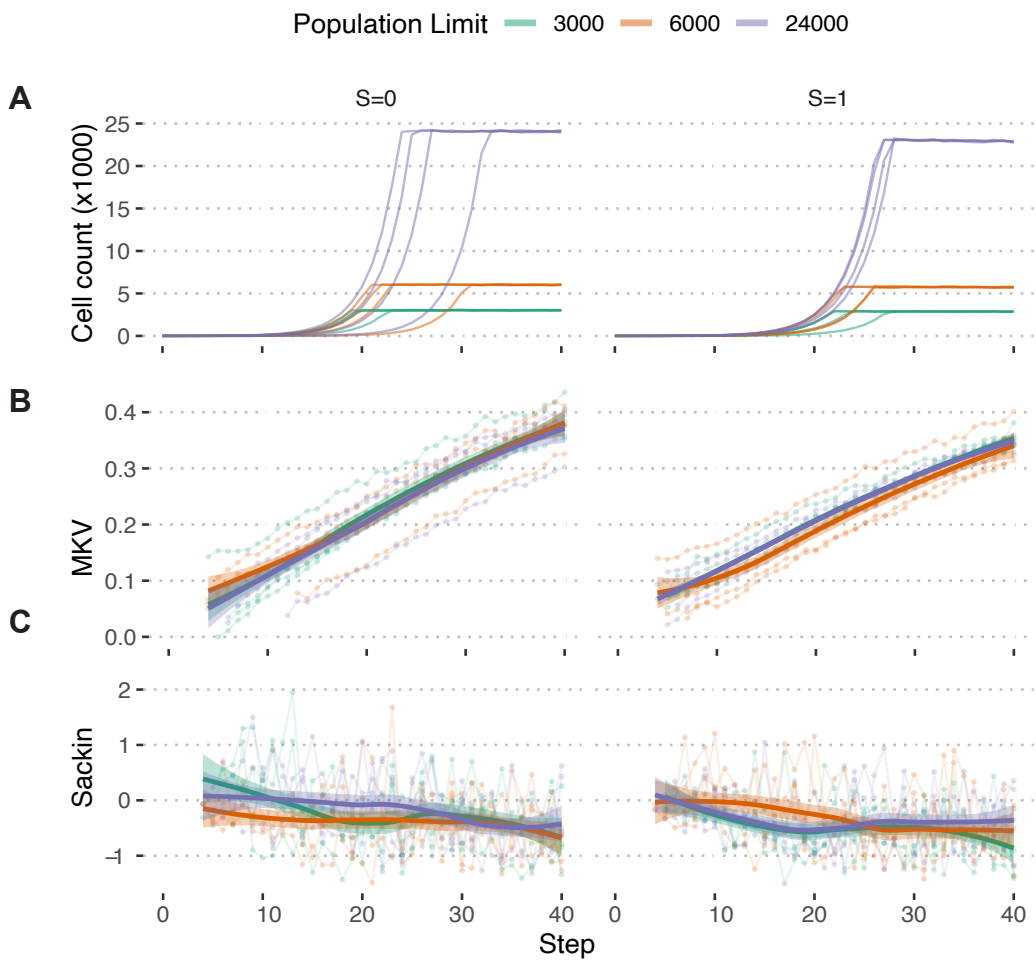

Supplement: supp [file elife-69799-supp-v1.zip]

Figure 5 — figure supplement 3: Summary statistic optimization for ABC

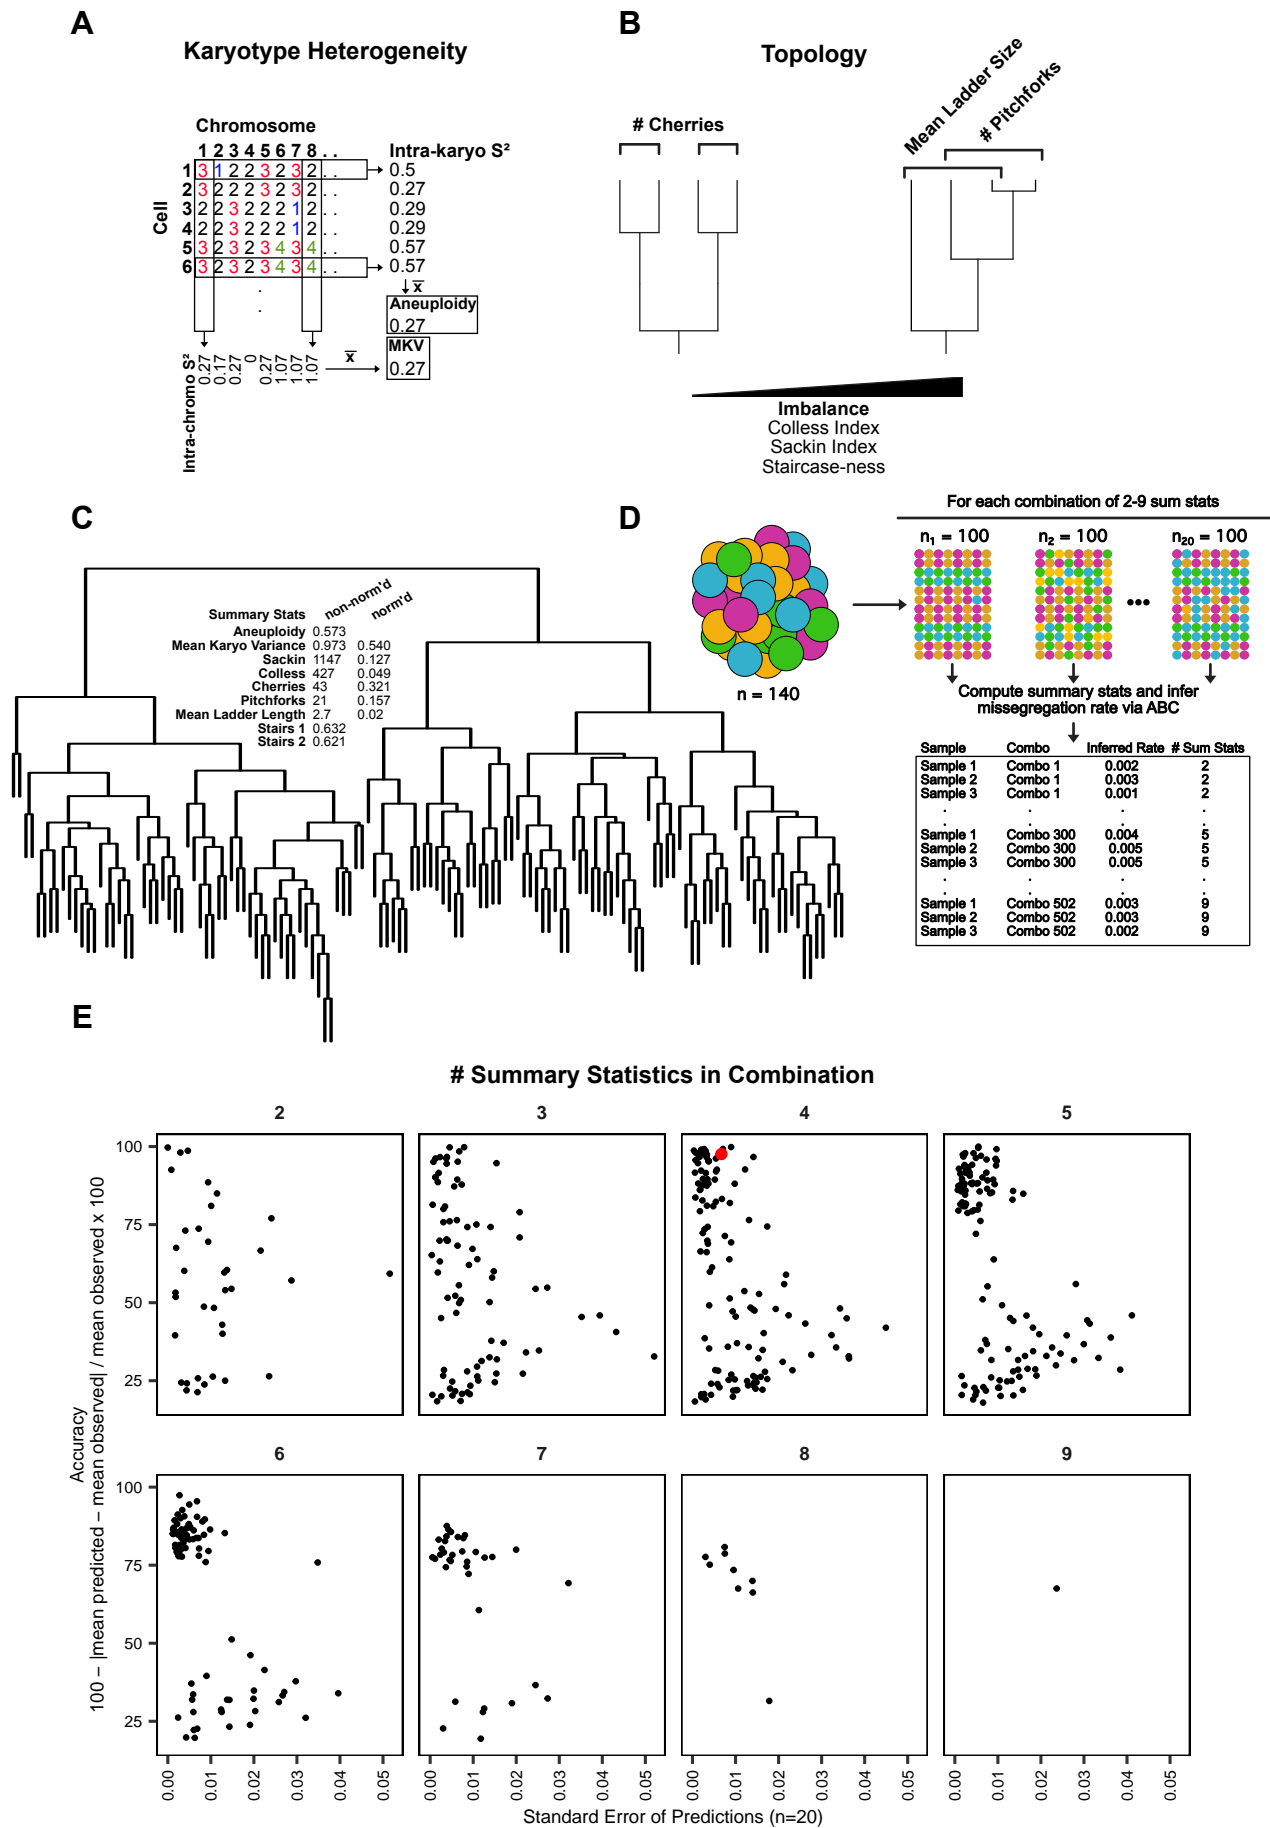

Supplement: supp [file elife-69799-supp-v1.zip]

Figure 1 — figure supplement 1: Modeling chromosomal instability and karyotype selection

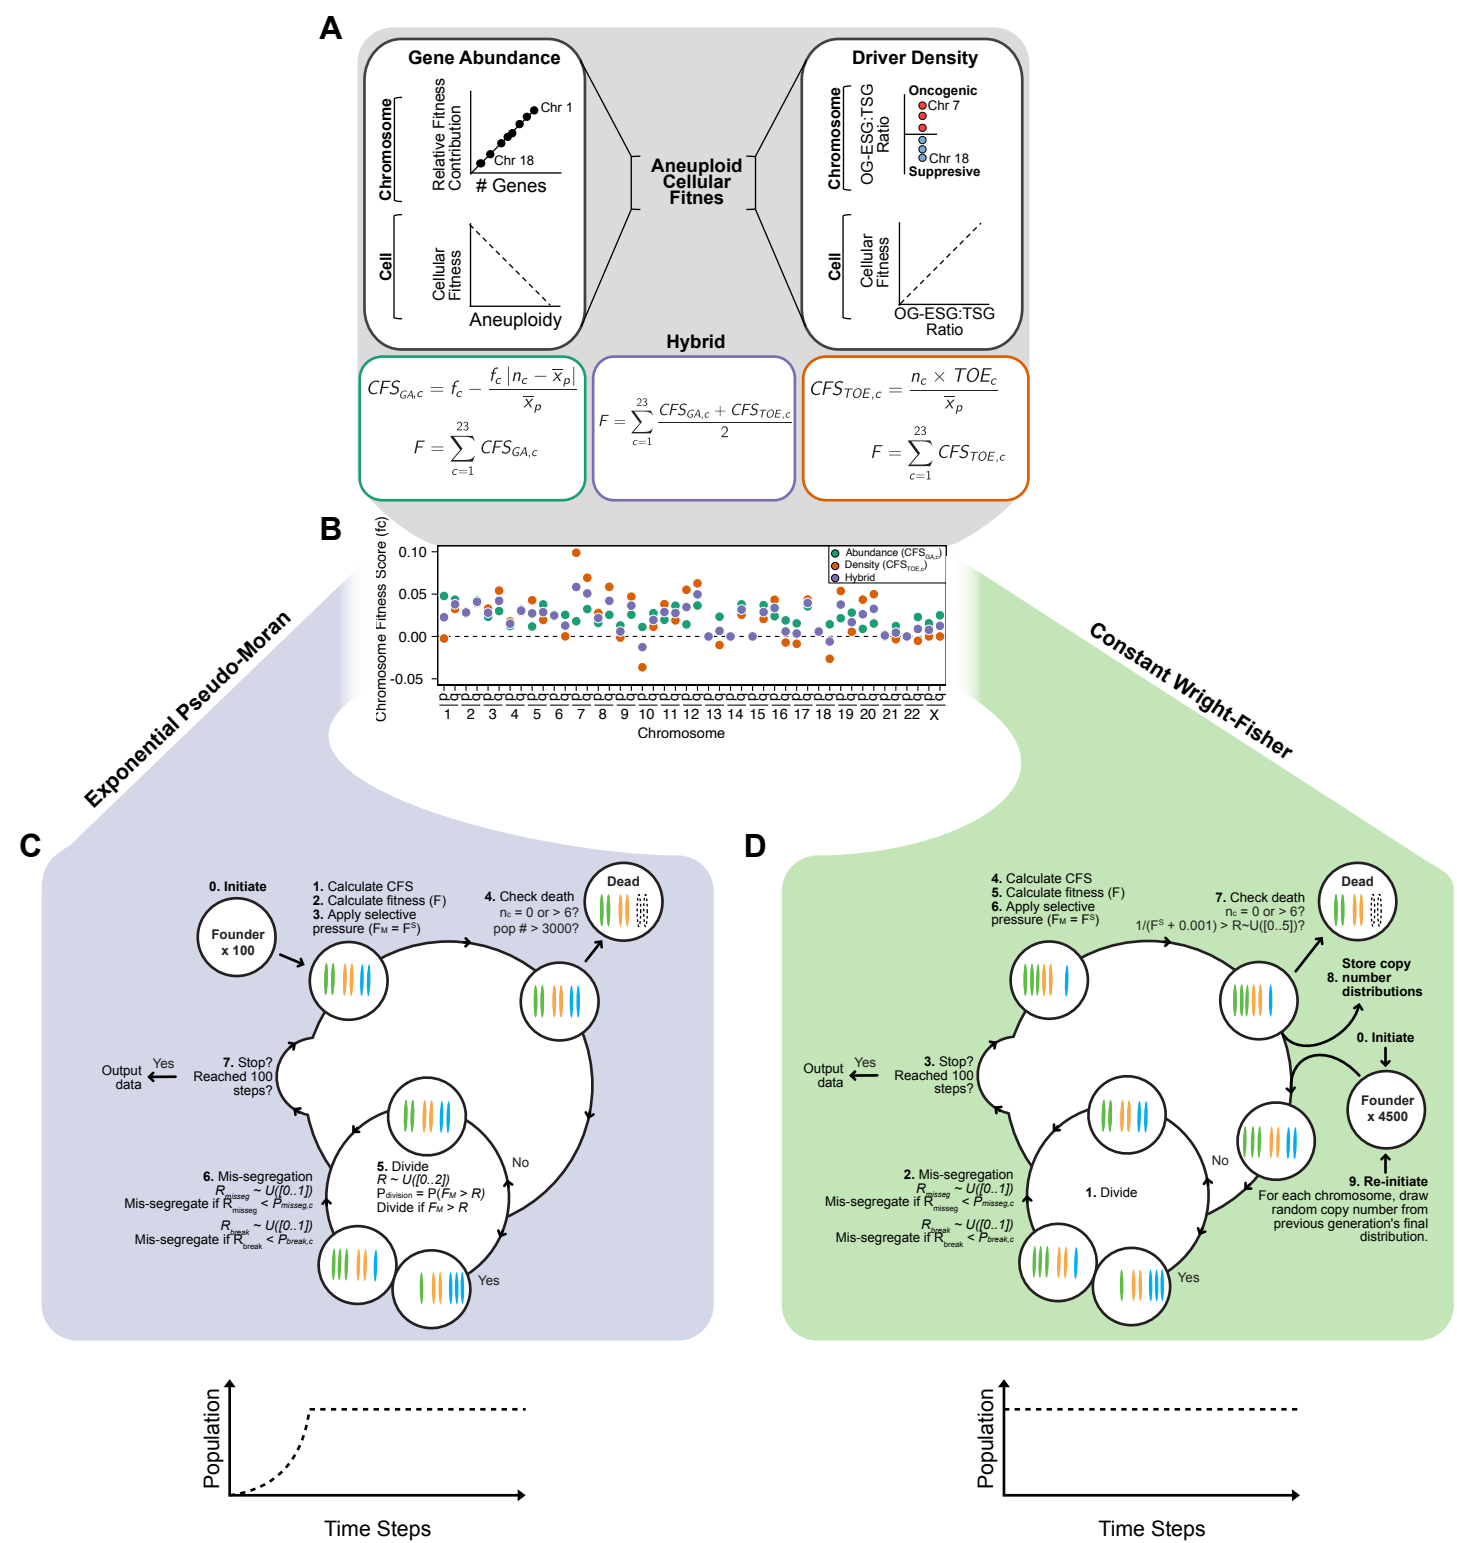

Supplement: supp [file elife-69799-supp-v1.zip]

Figure 5 — figure supplement 1: Induction of extensive chromosome missegregation via paclitaxel

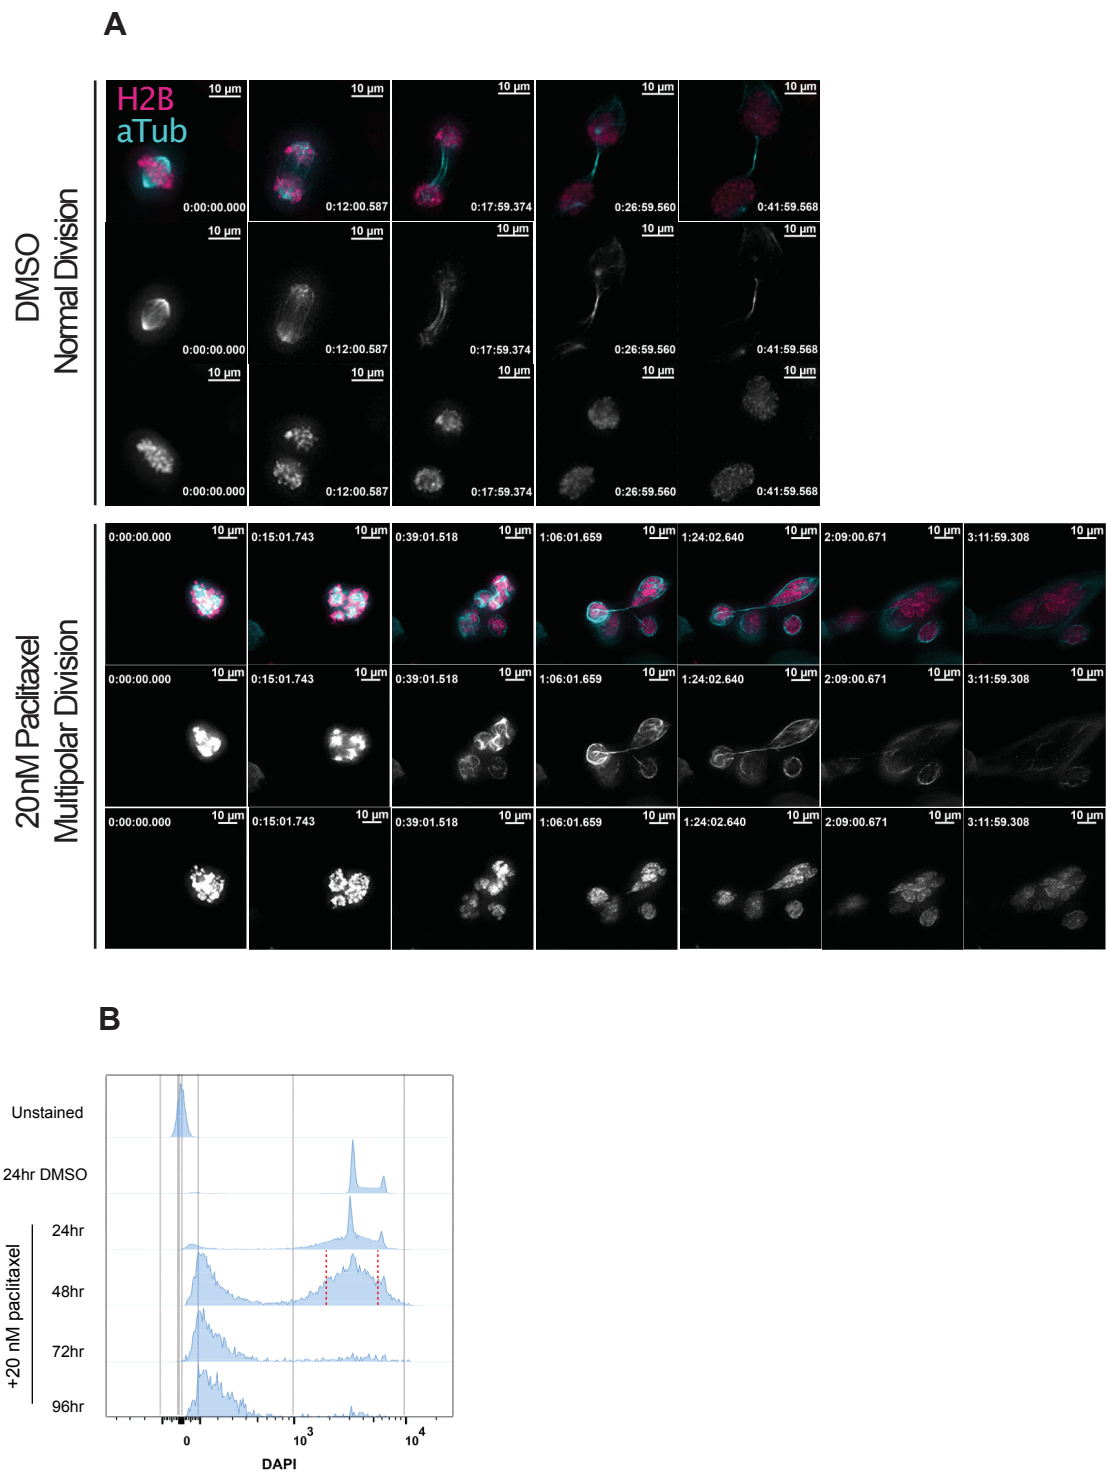

Supplement: supp [file elife-69799-supp-v1.zip]

Figure 6 — figure supplement 5: Joint posterior distributions from CRC organoids at 3 weeks

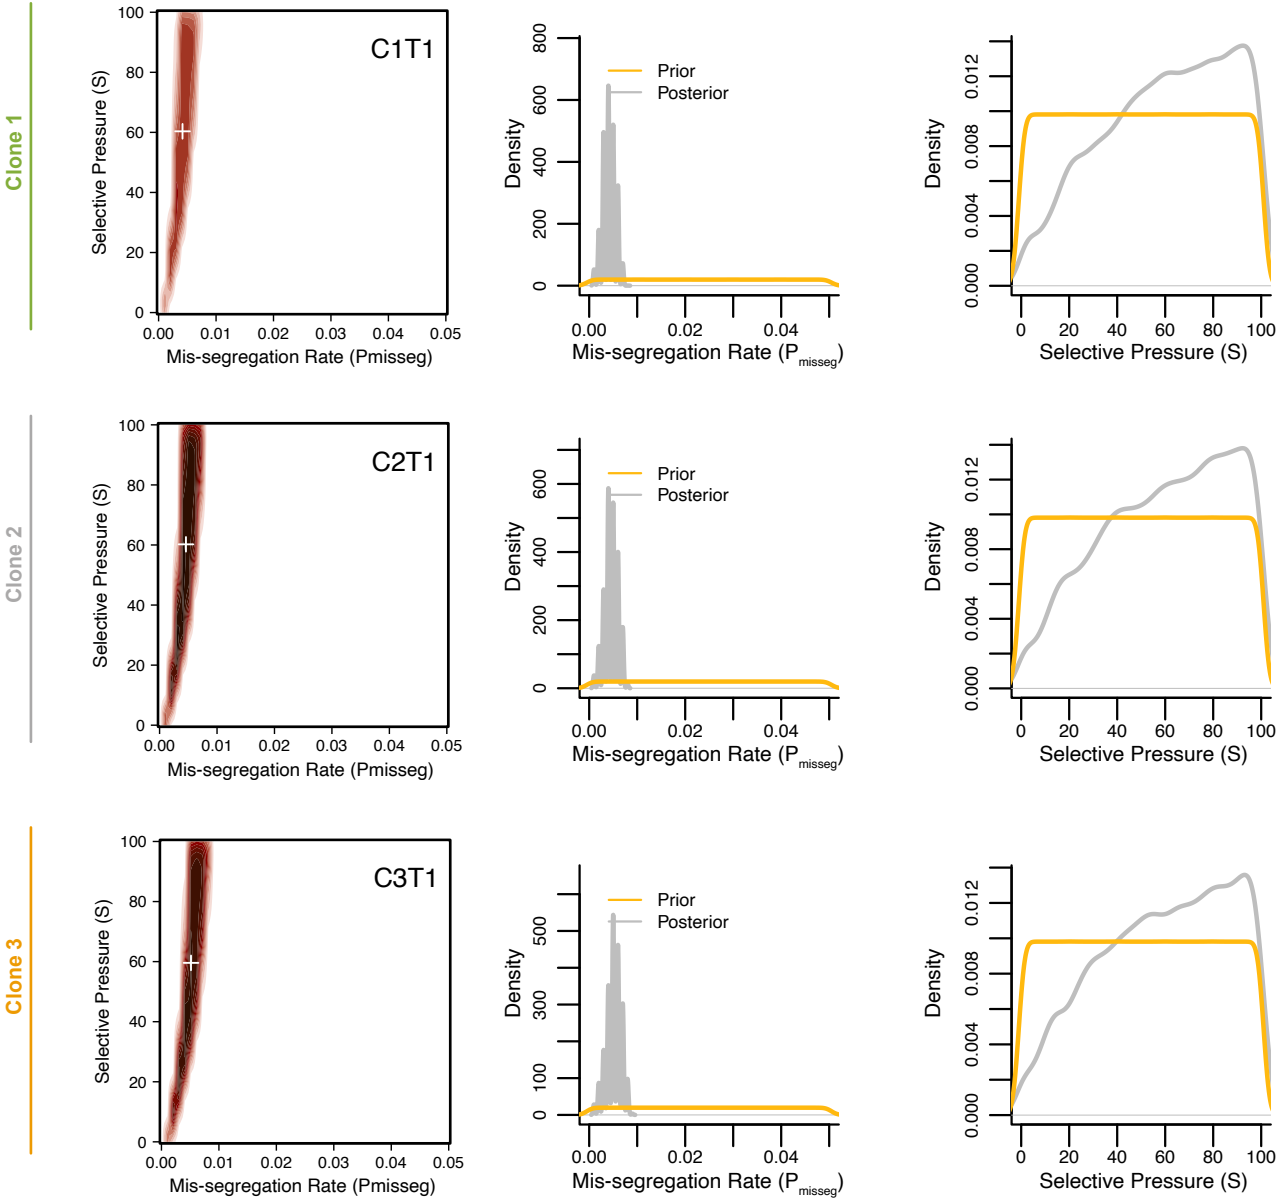

Supplement: supp [file elife-69799-supp-v1.zip]

Figure 5 — figure supplement 2: Copy number profiles of DMSO- and paclitaxel-treated Cal51 cells

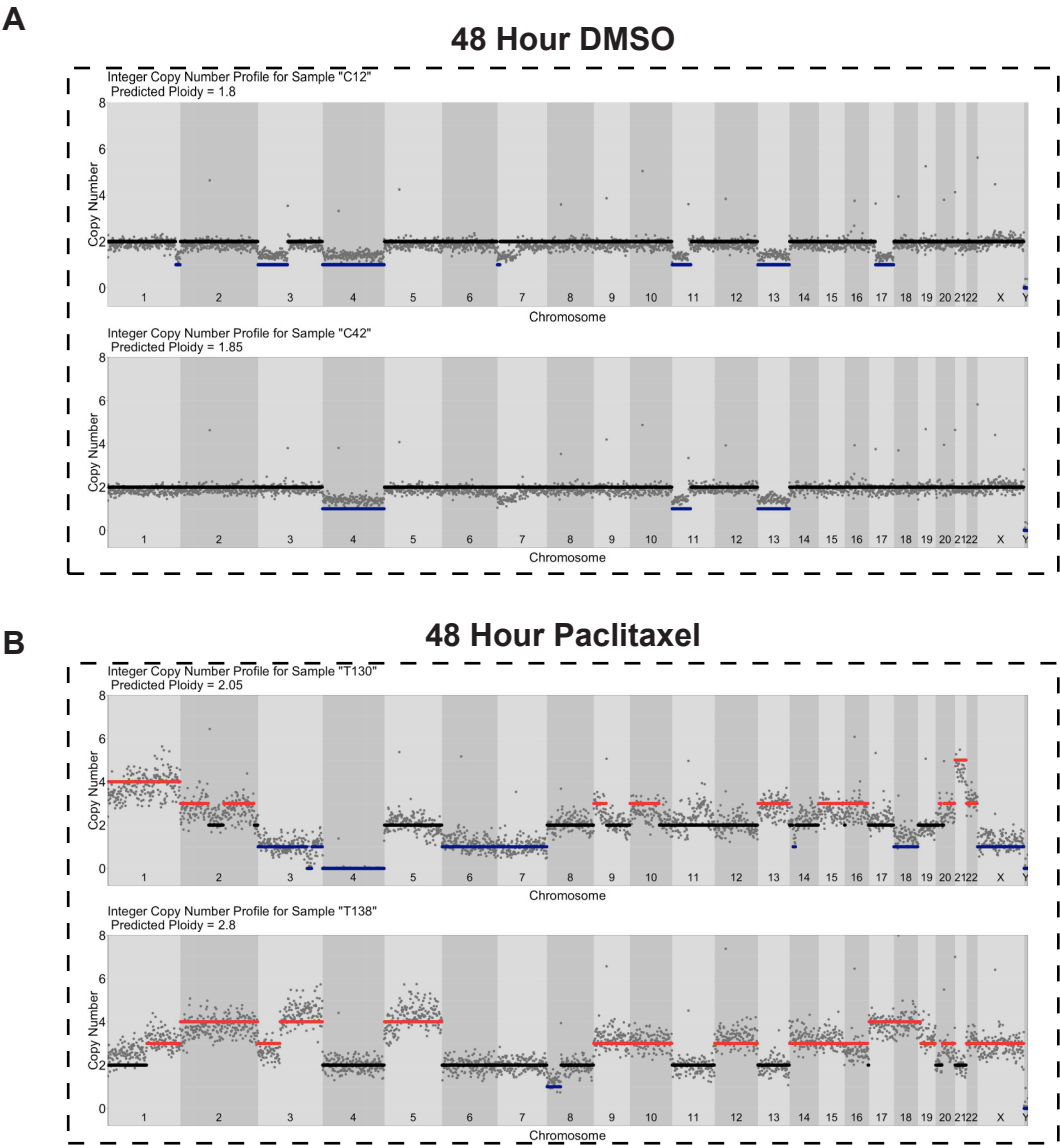

Supplement: supp [file elife-69799-supp-v1.zip]

Figure 6 — figure supplement 2: ABC-inferred steps in patient-derived samples

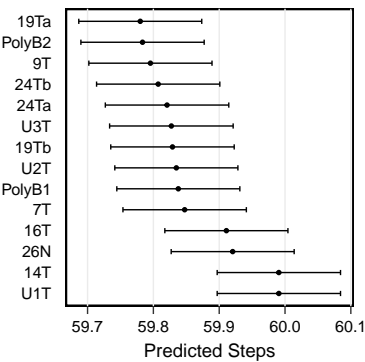

Supplement: supp [file elife-69799-supp-v1.zip]

Figure 3 — figure supplement 1: Characteristics of long-term karyotype evolution trajectories

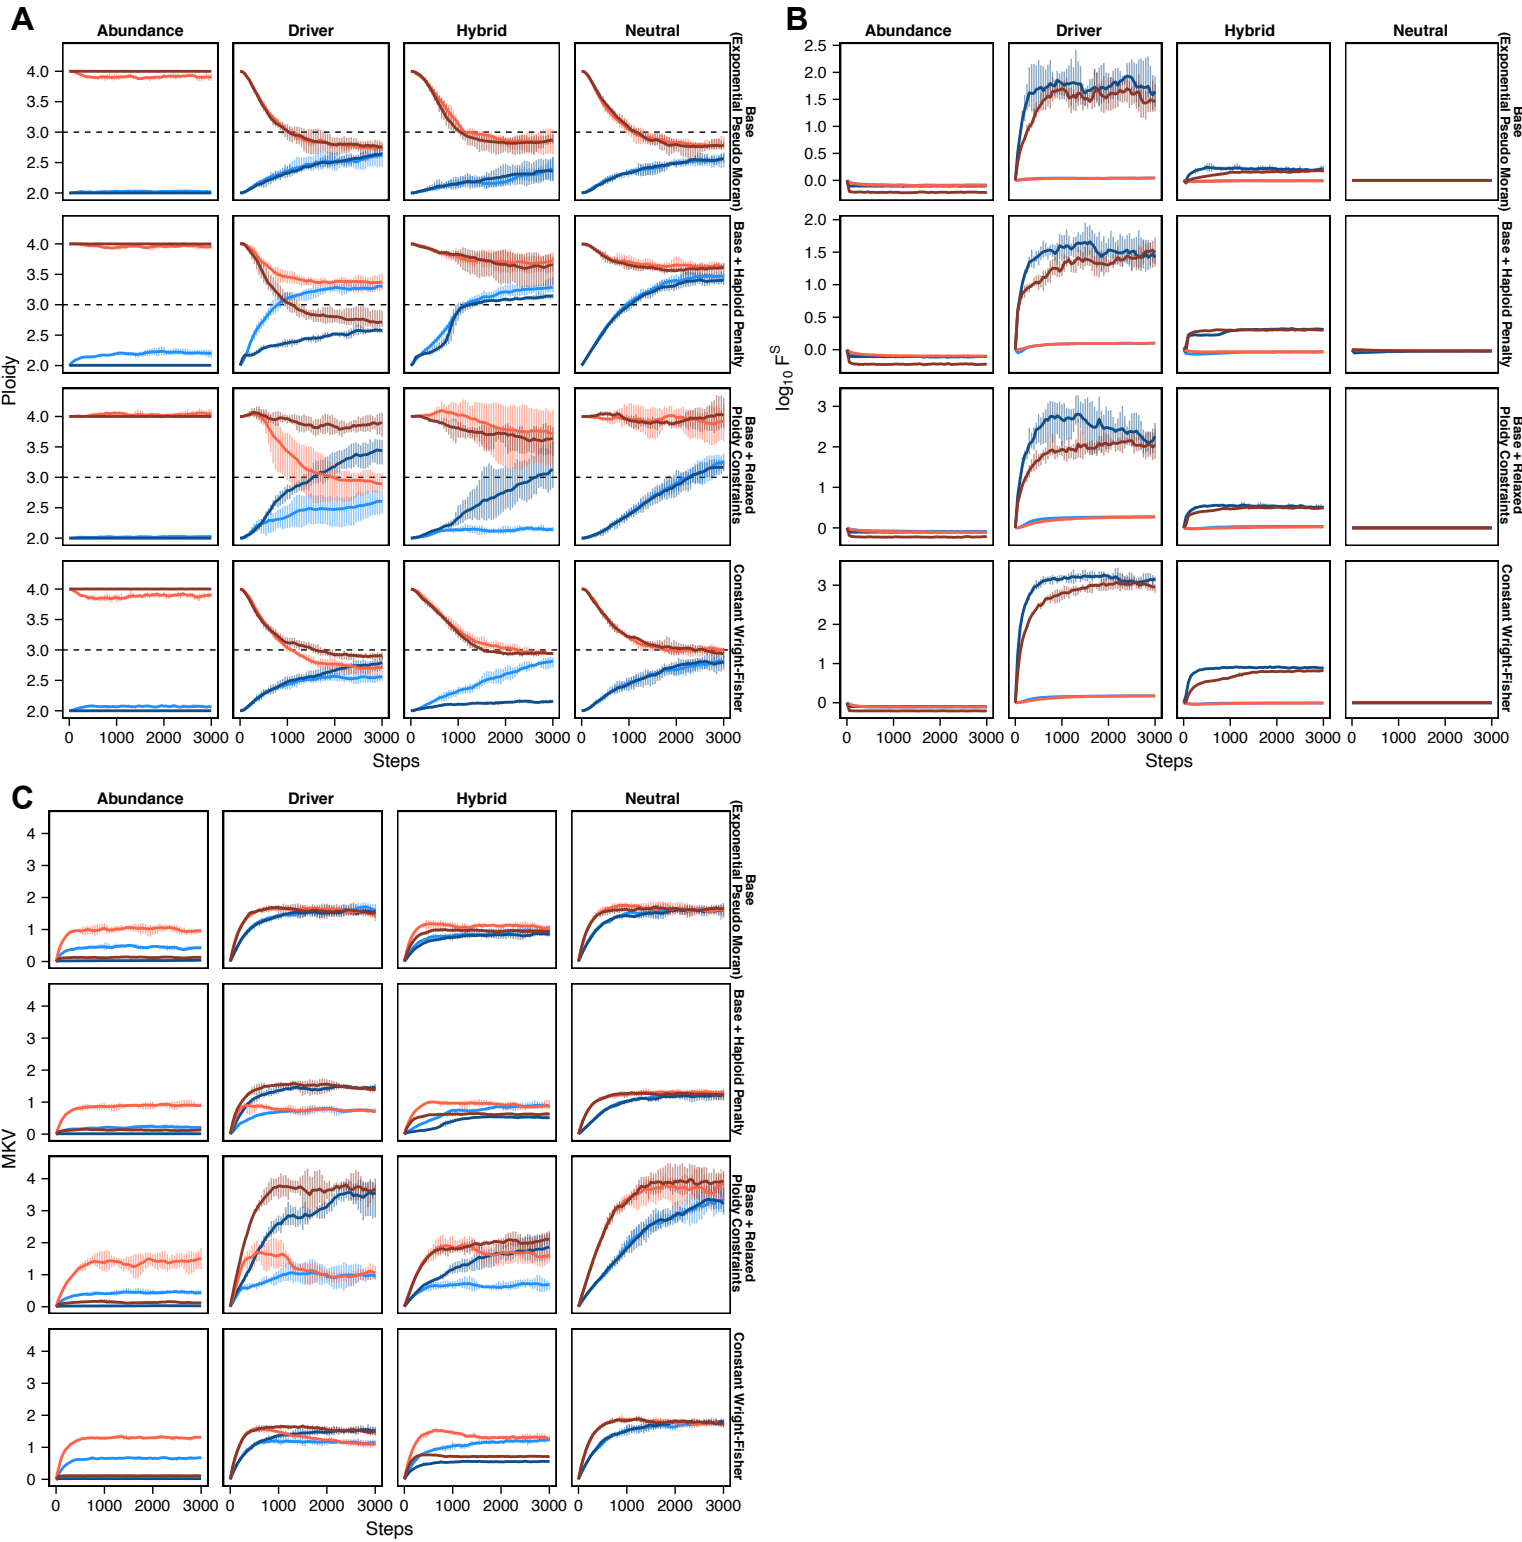

Supplement: supp [file elife-69799-supp-v1.zip › elife_poa_e69799_Figure_3_figure_supplement_1.pdf]

**Figure 6 — figure supplement 1: ABC-inference threshold and step-window analysis**

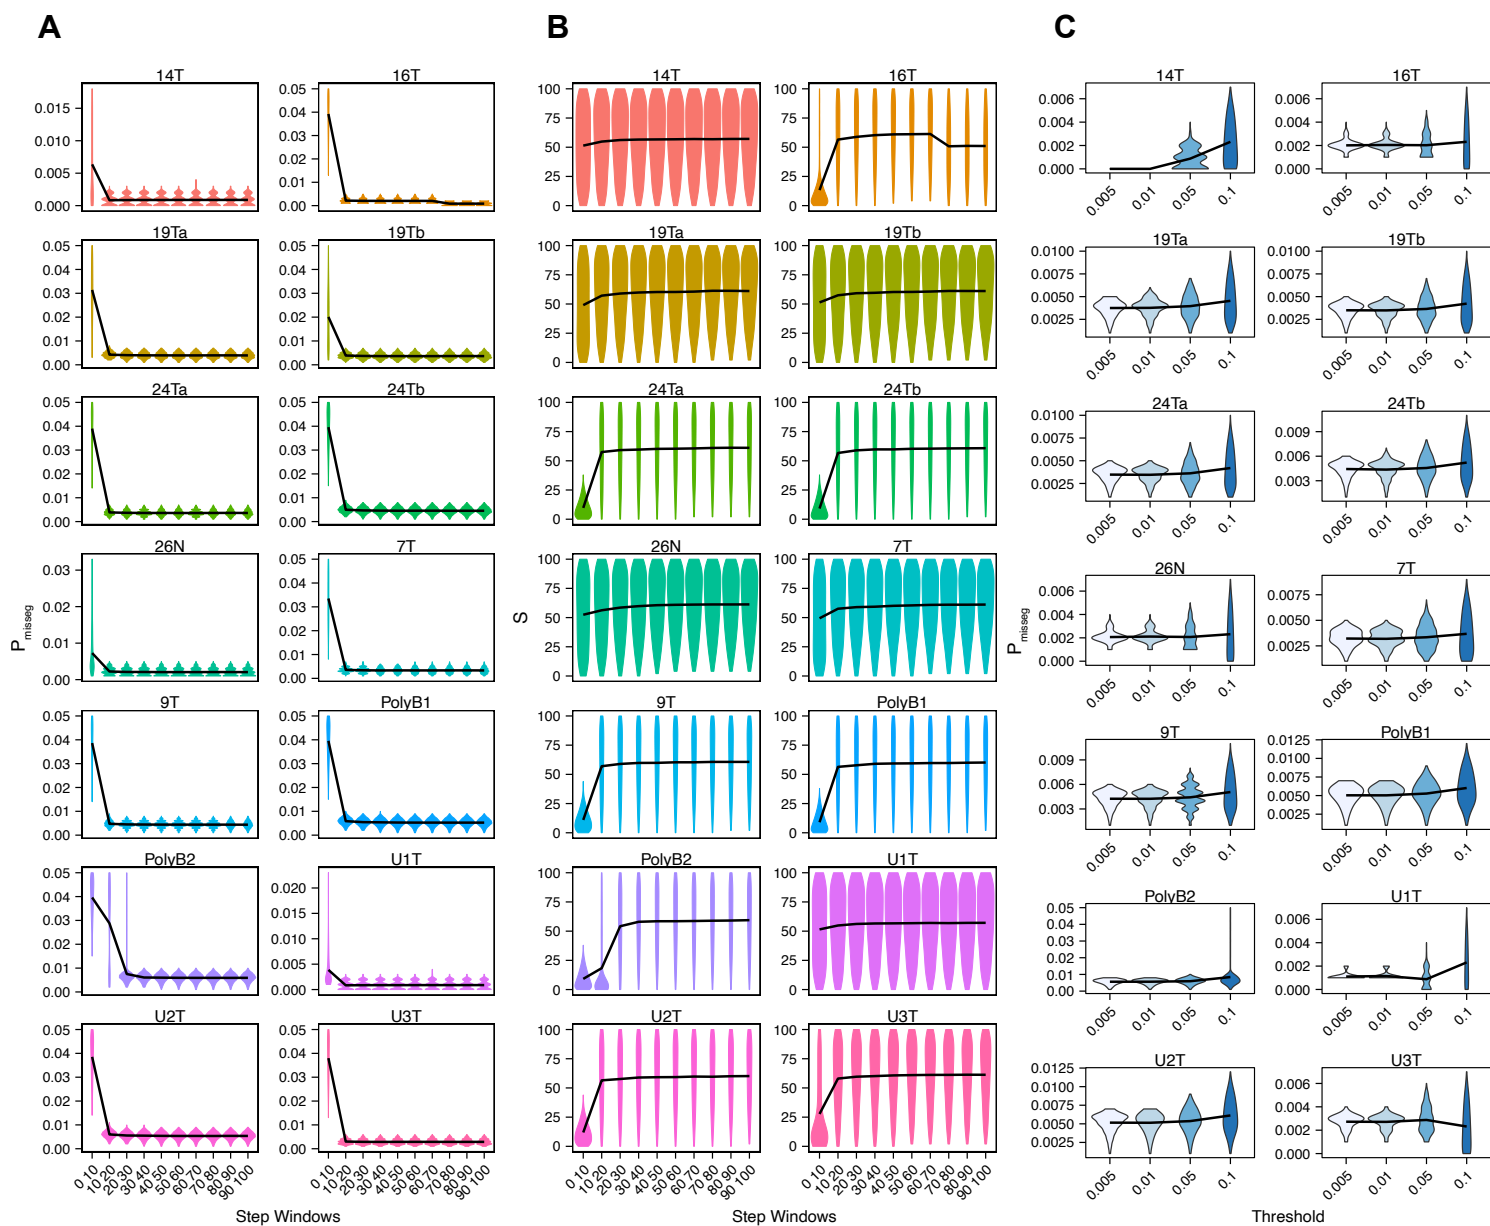

Supplement: supp [file elife-69799-supp-v1.zip › elife_poa_e69799_Figure_6_figure_supplement_1.pdf]
